# Supplementary material
Source: PubMed Central journal article supplement (PMC1482501)

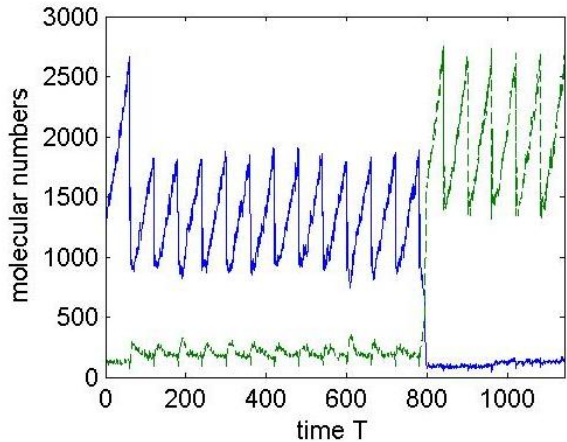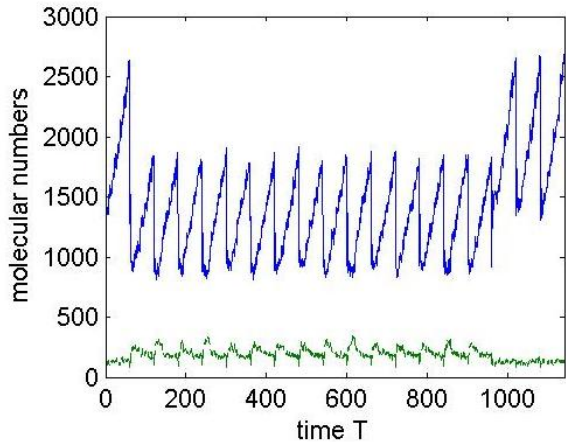

Supplement: pnas_0507818103_1.pdf [file pnas_0507818103_1.pdf]

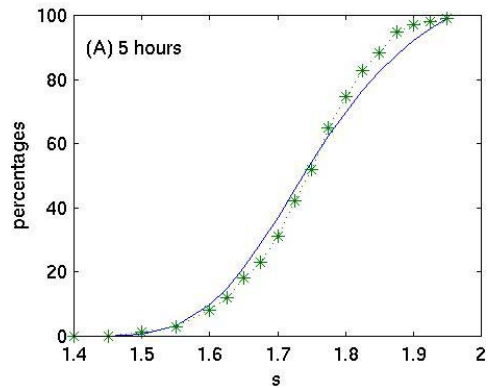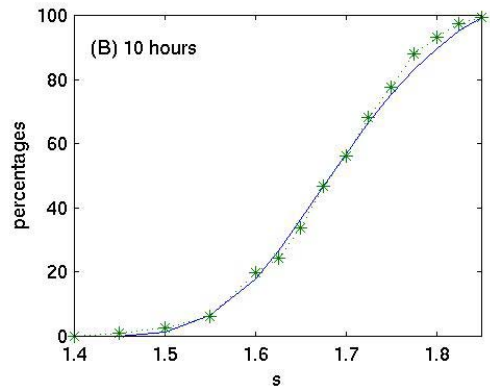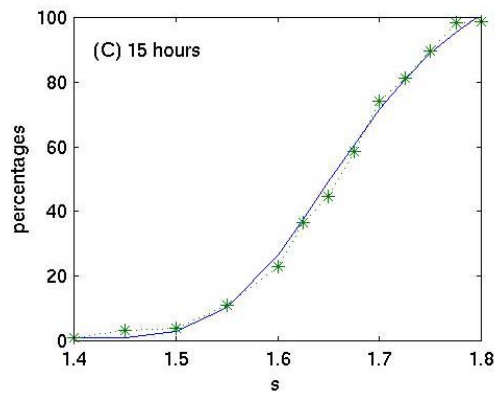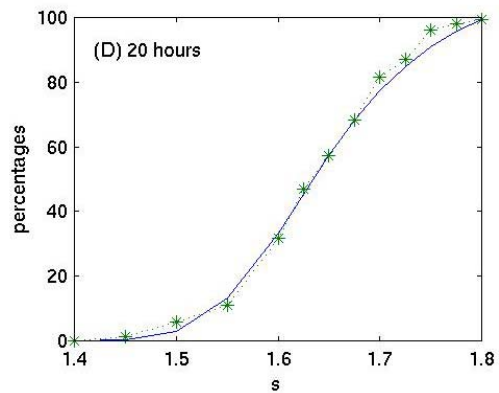

Supplement: pnas_0507818103_2.pdf [file pnas_0507818103_2.pdf]

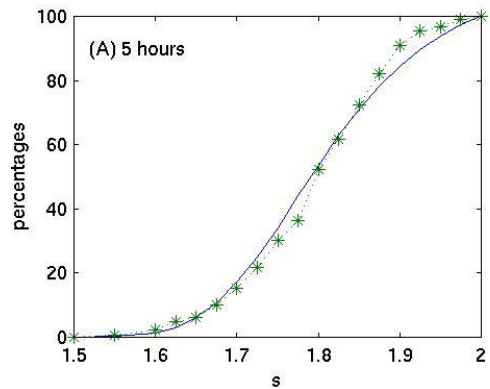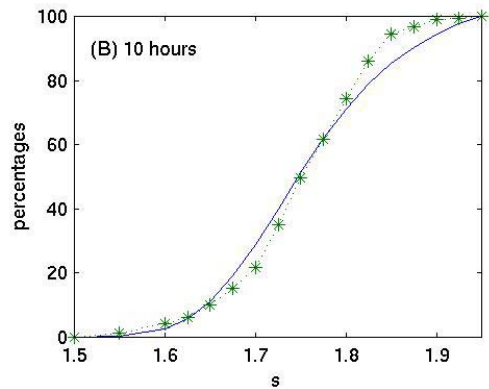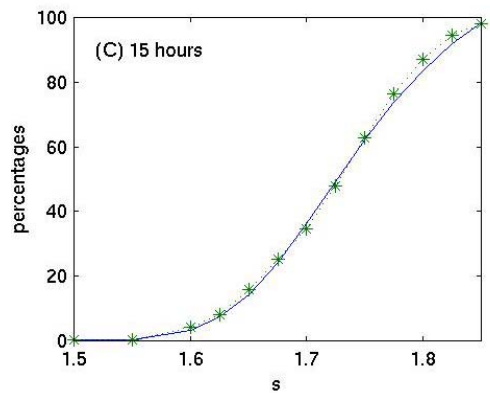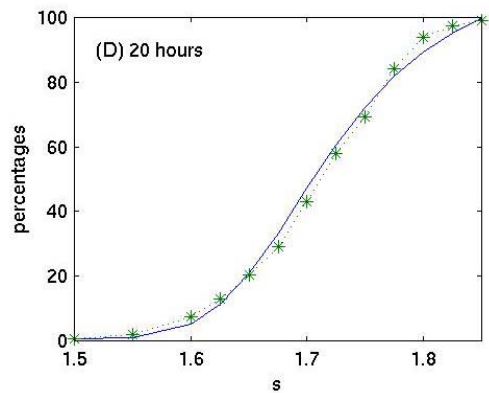

Supplement: pnas_0507818103_3.pdf [file pnas_0507818103_3.pdf]

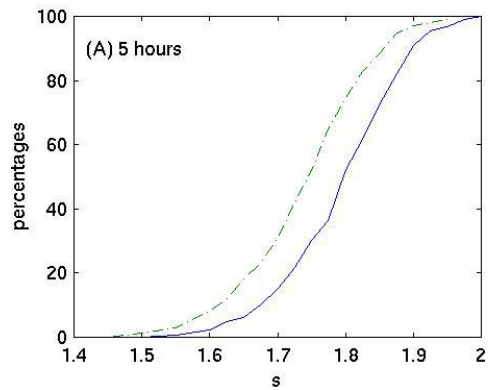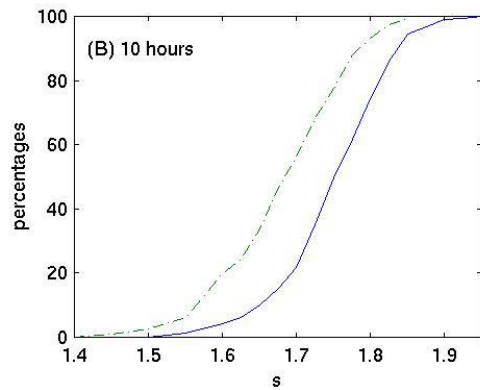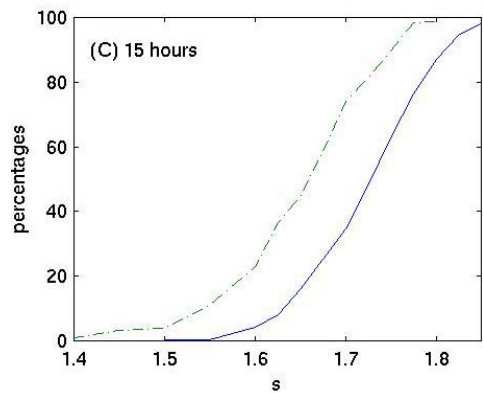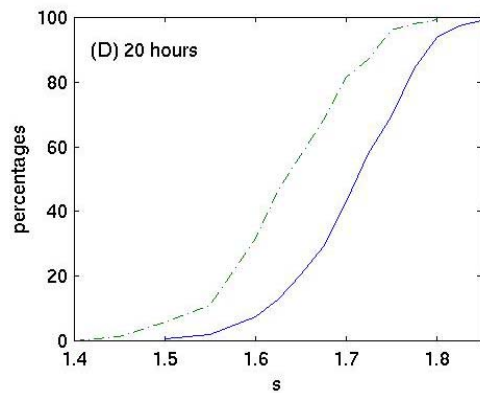

Supplement: pnas_0507818103_4.pdf [file pnas_0507818103_4.pdf]
